# Supplementary material for: Steric effect for proton, hydrogen-atom, and hydride transfer reactions with geometric isomers of NADH–model ruthenium complexes
Source: Royal Society of Chemistry journal article supplement (doi:10.1039/c1fd00094b), 2011-07-07

# Steric Effects for Proton, Hydrogen-Atom, and Hydride Transfer Reactions with Geometric Isomers of NADH-Model Ruthenium Complexes

*Brian W. Cohen,<sup>†</sup> Dmitry E. Polyansky,<sup>\*,†</sup> Patrick Achord,<sup>†</sup> Diane Cabelli,<sup>†</sup>  
James T. Muckerman,<sup>†</sup> Koji Tanaka,<sup>§</sup> Randolph P. Thummel,<sup>‡</sup> Ruifa Zong,<sup>‡</sup> and Etsuko Fujita<sup>\*,†</sup>*

<sup>†</sup> Chemistry Department, Brookhaven National Laboratory, Upton, New York 11973-5000, USA

<sup>§</sup> Institute for Molecular Science, 5-1 Higashiyama, Myodaiji, Okazaki, Aichi 444-8787, Japan

<sup>‡</sup> Department of Chemistry, University of Houston, Houston TX 77204-5003, USA

## Supporting Information

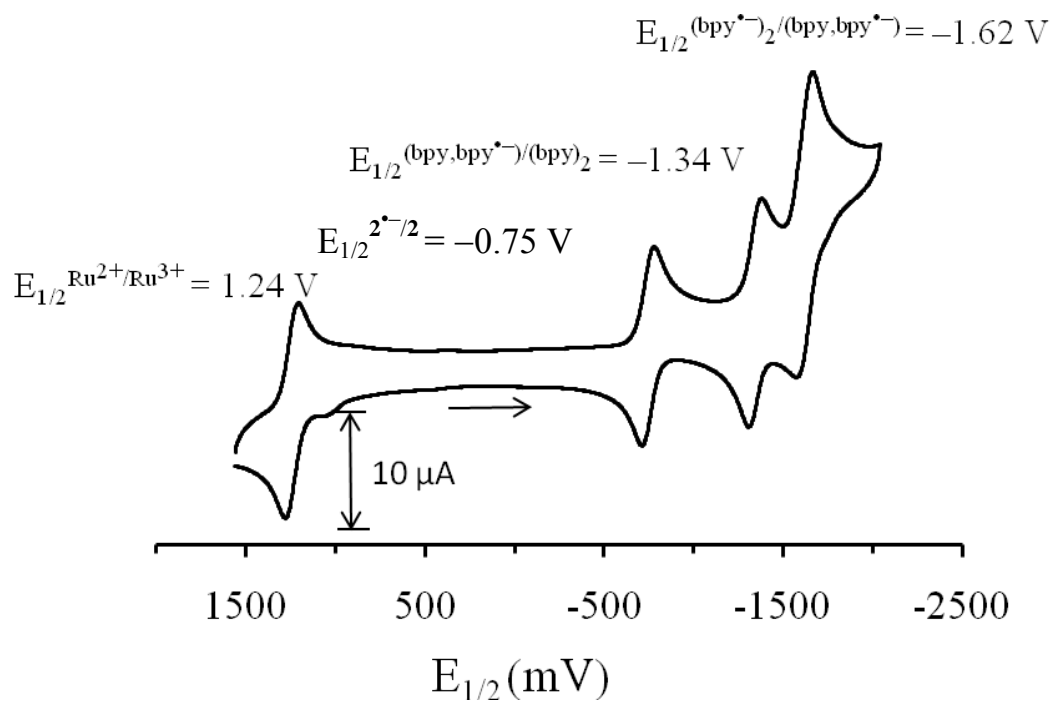

Figure S1. Cyclic voltammogram of  $[\text{Ru}(\mathbf{2})]^{2+}$  in  $\text{CH}_3\text{CN}$  versus SCE.

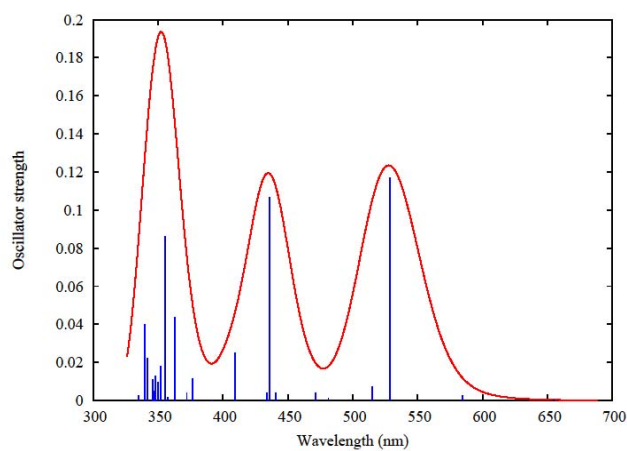

### Assignments of the absorption bands of $[\text{Ru}(2)]^{2+}$

| Peak            | Percent | Transition                  |                         |
|-----------------|---------|-----------------------------|-------------------------|
| 528 nm (2.3 eV) | 0.2     | HOMO-2 $\rightarrow$ LUMO   | MLCT                    |
|                 | 0.21    | HOMO-1 $\rightarrow$ LUMO   | MLCT                    |
| 436 nm (2.8 eV) | 0.35    | HOMO-2 $\rightarrow$ LUMO+1 | MLCT                    |
|                 | 0.08    | HOMO-1 $\rightarrow$ LUMO+2 | MLCT                    |
| 355 nm (3.5 eV) | 0.08    | HOMO-4 $\rightarrow$ LUMO   | $\pi \rightarrow \pi^*$ |
|                 | 0.12    | HOMO-2 $\rightarrow$ LUMO+3 | MLCT                    |
|                 | 0.15    | HOMO-1 $\rightarrow$ LUMO+4 | MLCT                    |

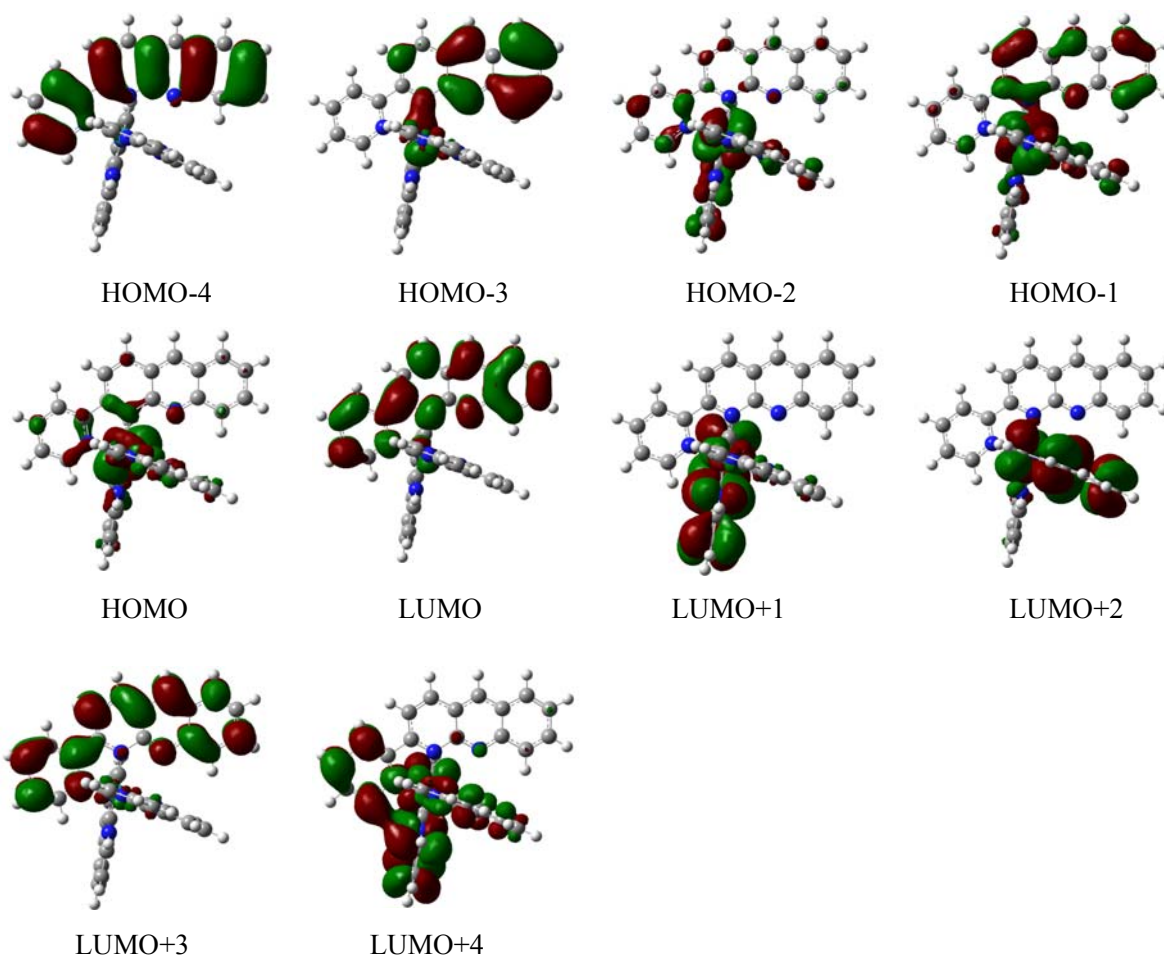

Figure S2. Calculated spectrum, assignment of absorption bands and the frontier orbitals of  $[\text{Ru}(2)]^{2+}$ .

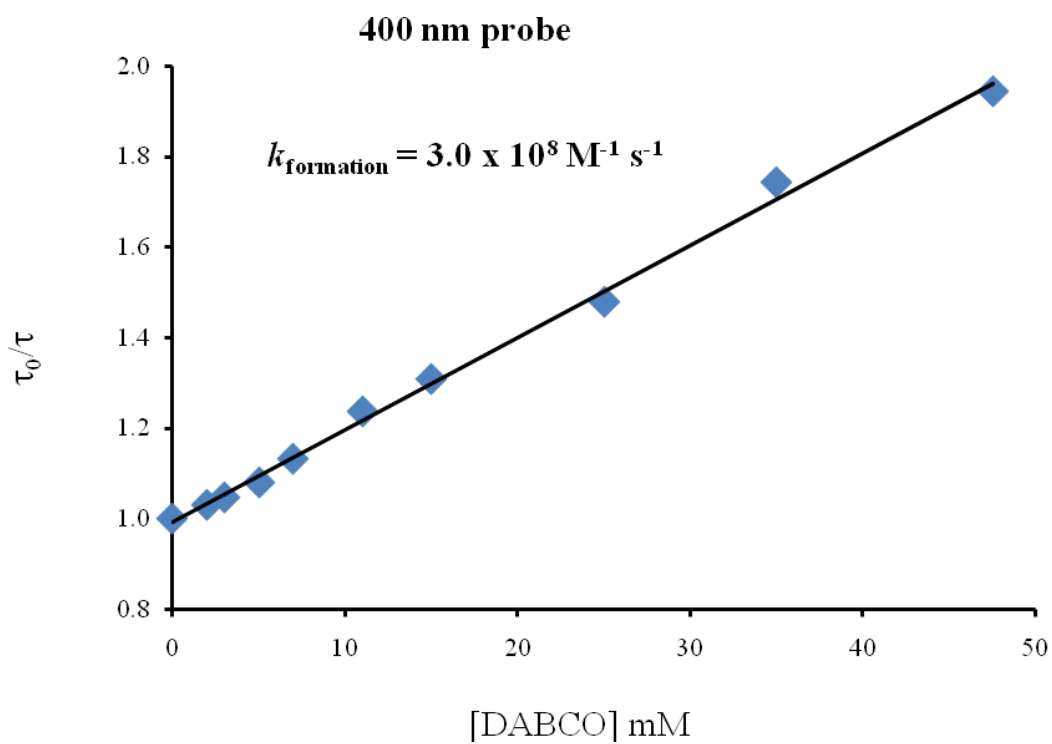

Figure S3. The bimolecular rate constant of quenching the excited state of  $[\text{Ru}(\mathbf{2})]^{2+}$  by DABCO in acetonitrile.

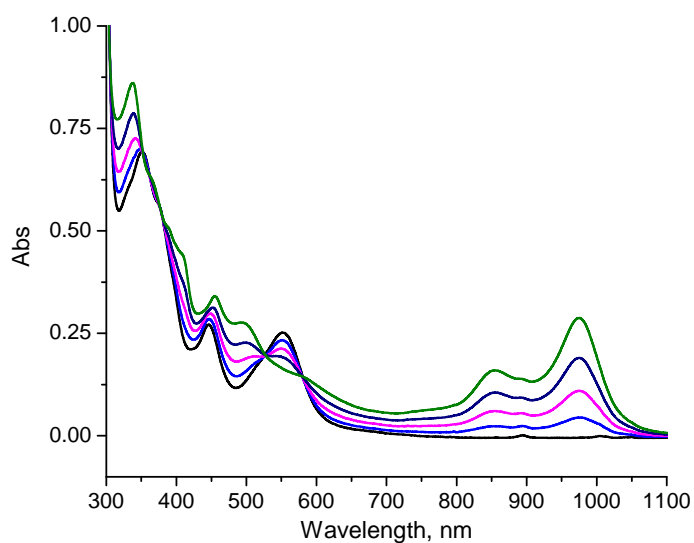

Figure S4. UV-vis-NIR absorption spectra of stepwise reduction of [Ru(2)]<sup>2+</sup> (black) to [Ru(2<sup>•-</sup>)]<sup>+</sup> (green) by Na/Hg amalgam in CH<sub>3</sub>CN.

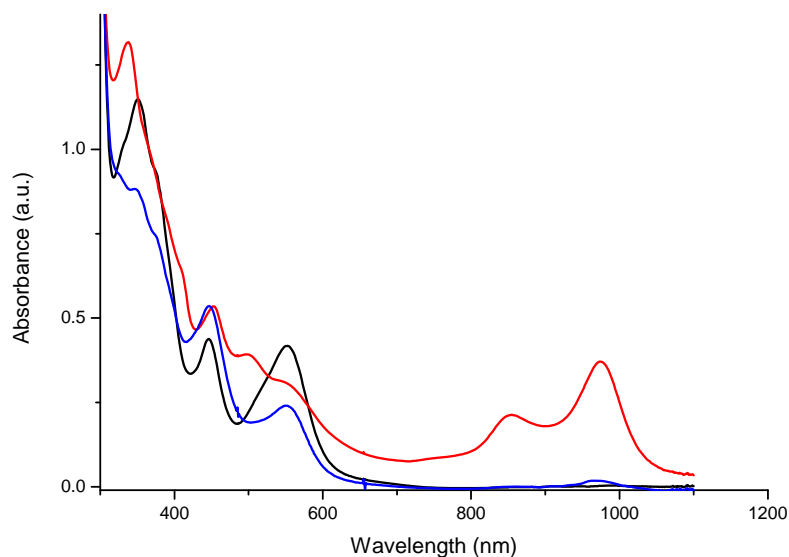

Figure S5. UV-vis-NIR spectra of photochemical formation of [Ru(2<sup>•-</sup>)]<sup>+</sup> (red) from [Ru(2)]<sup>2+</sup> (black) in CH<sub>3</sub>CN/NEt<sub>3</sub>. The blue spectrum measured after an addition of 10 eq. of HClO<sub>4</sub> to the [Ru(2<sup>•-</sup>)]<sup>+</sup> solution indicates formation of a 1:1 mixture of [Ru(2)]<sup>2+</sup> and [Ru(2HH)]<sup>2+</sup>.

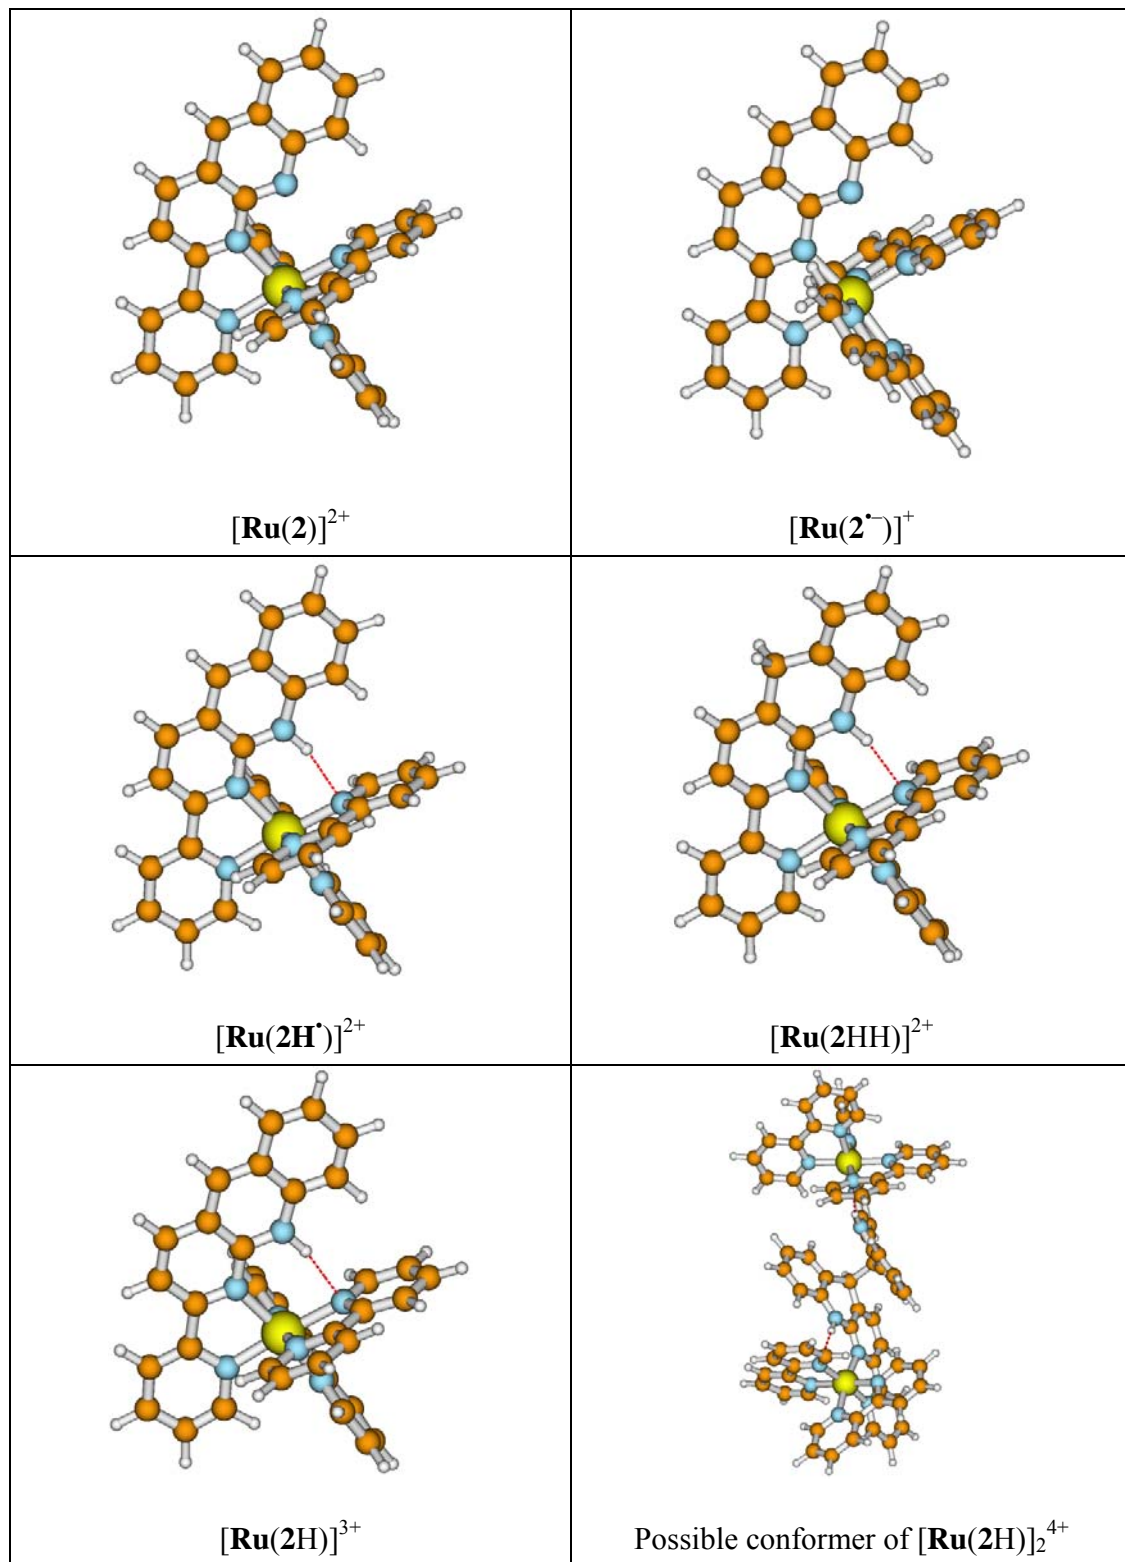

Figure S6. Calculated structures of  $[\mathbf{Ru}(\mathbf{2})]^{2+}$ ,  $[\mathbf{Ru}(\mathbf{2}^-)]^+$ ,  $[\mathbf{Ru}(\mathbf{2H}')]^{2+}$ ,  $[\mathbf{Ru}(\mathbf{2HH})]^{2+}$ ,  $[\mathbf{Ru}(\mathbf{2H})]^{3+}$  and a possible isomer of  $[\mathbf{Ru}(\mathbf{2H})_2]^{4+}$ . The red line indicates an internal hydrogen bond between the protonated N atom and a coordinated N of the bpy ligand.

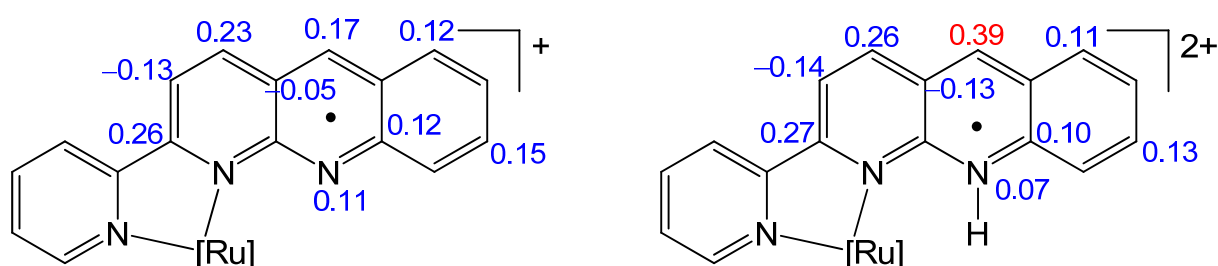

Figure S7. Calculated Mulliken atomic spin densities in  $[\mathbf{Ru}(\mathbf{2}^-)]^+$  and protonated  $[\mathbf{Ru}(\mathbf{2H}')]^{2+}$ .

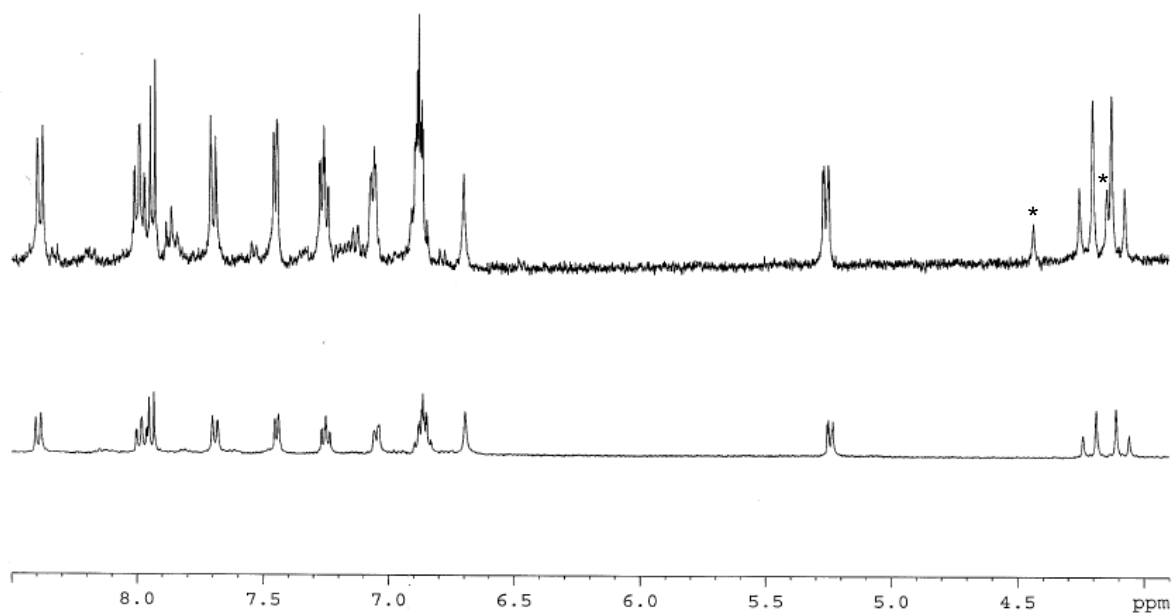

Figure S8.  $^1\text{H}$  NMR spectra of  $[\mathbf{Ru}(\mathbf{2HH})]^{2+}$  photochemically (top) and chemically (bottom) produced in  $\text{CD}_3\text{CN}$ . Impurities due to photodecomposition are labeled (\*).

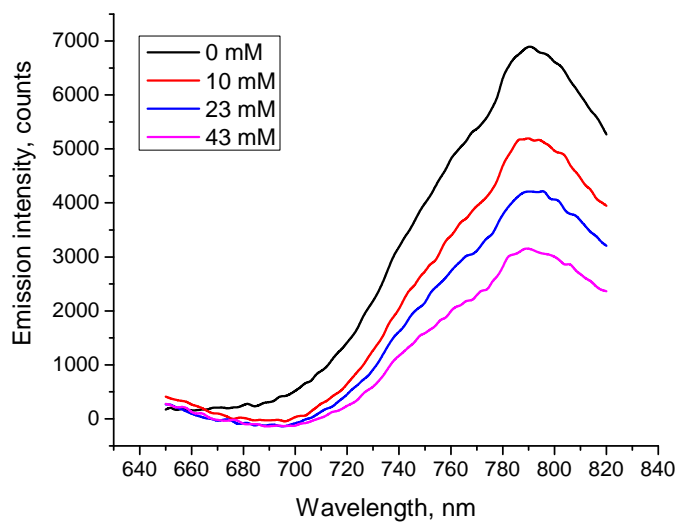

Figure S9. Uncorrected emission spectra of  $[\text{Ru}(\mathbf{1})]^{2+}$  in  $\text{CH}_3\text{CN}$  (excitation at 528 nm) in the presence of different concentrations of  $\text{H}_2\text{Q}$ .

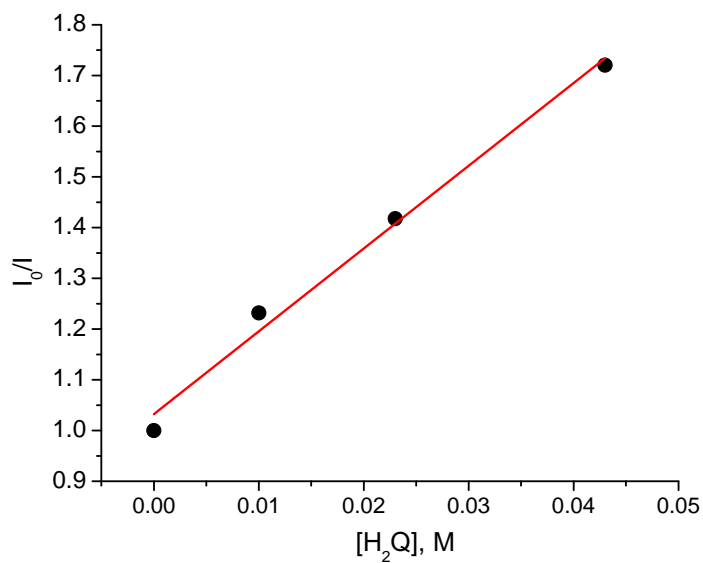

Figure S10. The plot of  $I_0/I$  vs. concentration of  $\text{H}_2\text{Q}$ , where  $I_0$  is the emission intensity in the absence of  $\text{H}_2\text{Q}$ . The red line is the linear fit with the slope =  $16.3 \text{ M}^{-1}$ .



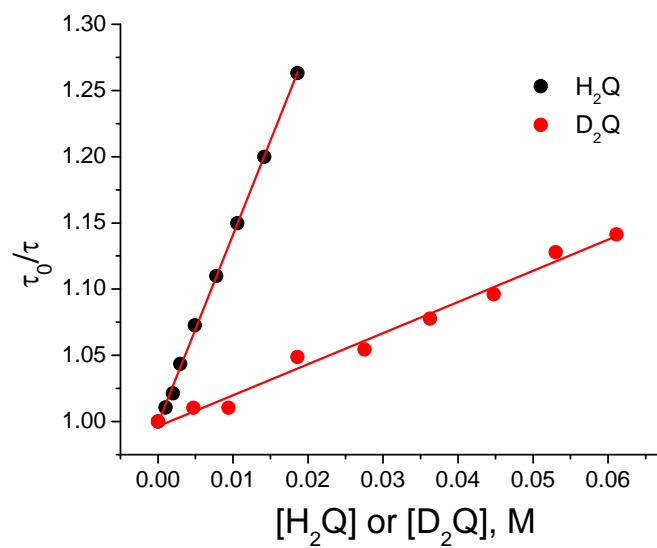

Figure S11. The bimolecular rate constant of reaction of H<sub>2</sub>Q and D<sub>2</sub>Q with <sup>\*</sup>[Ru(1)]<sup>2+</sup> in CH<sub>3</sub>CN. Kinetic isotope effect (KIE) was found to be  $k_H/k_D = 6.2$ .

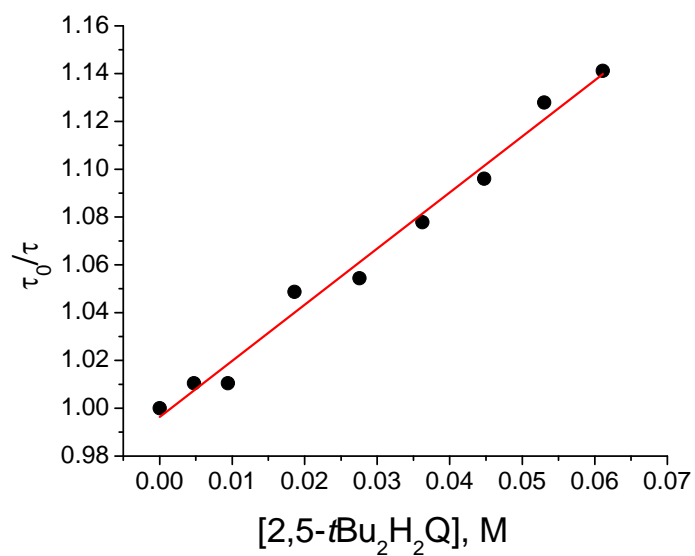

Figure S12. The bimolecular rate constant of reaction of H<sub>2</sub>Q(Bu<sup>1</sup>)<sub>2</sub> with <sup>\*</sup>[Ru(1)]<sup>2+</sup> in CH<sub>3</sub>CN.

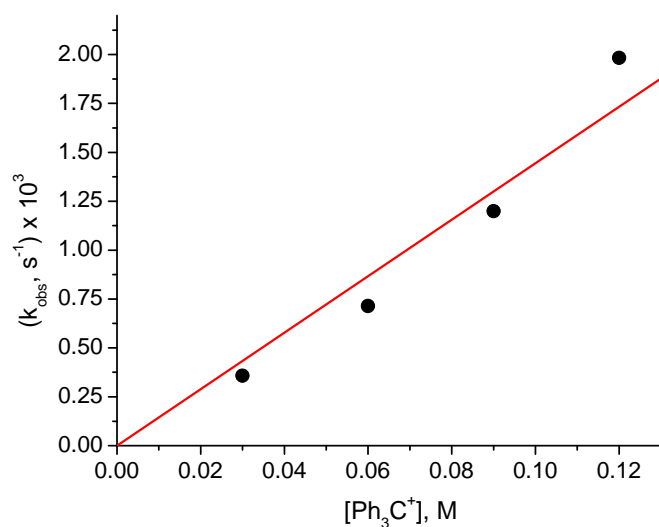

Figure S13. Observed rate of the formation of 626 nm band in the reaction between  $[\text{Ru}(\mathbf{1HH})]^{2+}$  and the excess of triphenyl carbenium cation in acetonitrile plotted vs. concentration of  $[\text{Ph}_3\text{C}^+]^+$ . The rate constant obtained from the linear fit was  $1.5 \times 10^{-2} \text{ M}^{-1} \text{ s}^{-1}$ .

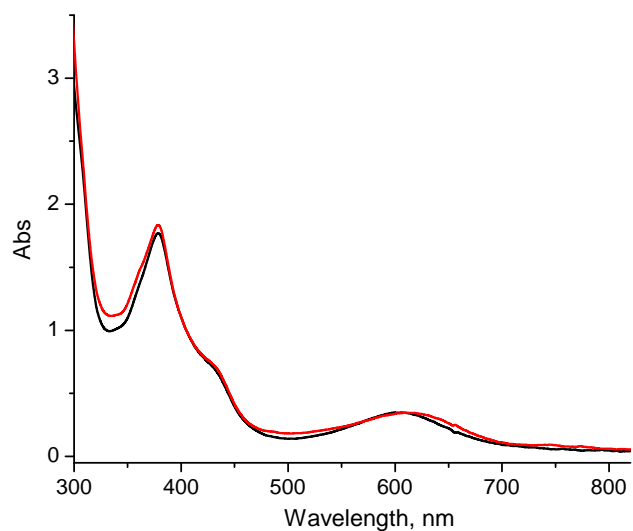

Figure S14. UV-vis spectra of the product of the reaction between  $[\text{Ru}(\mathbf{1HH})]^{2+}$  and  $[\text{Ph}_3\text{C}^+]^+$  in methylene chloride (black);  $[\text{Ru}(\mathbf{1H})]^{3+}$  in water pH = 1.

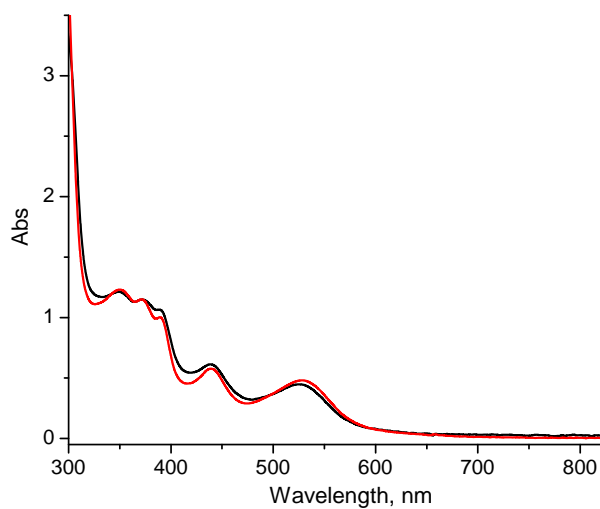

Figure S15. UV-vis spectra of the product of the reaction between  $[\text{Ru}(\mathbf{1HH})]^{2+}$  and  $[\text{Ph}_3\text{C}]^+$  in methylene chloride after addition of triethylamine (black);  $[\text{Ru}(\mathbf{1})]^{2+}$  in water pH = 7.

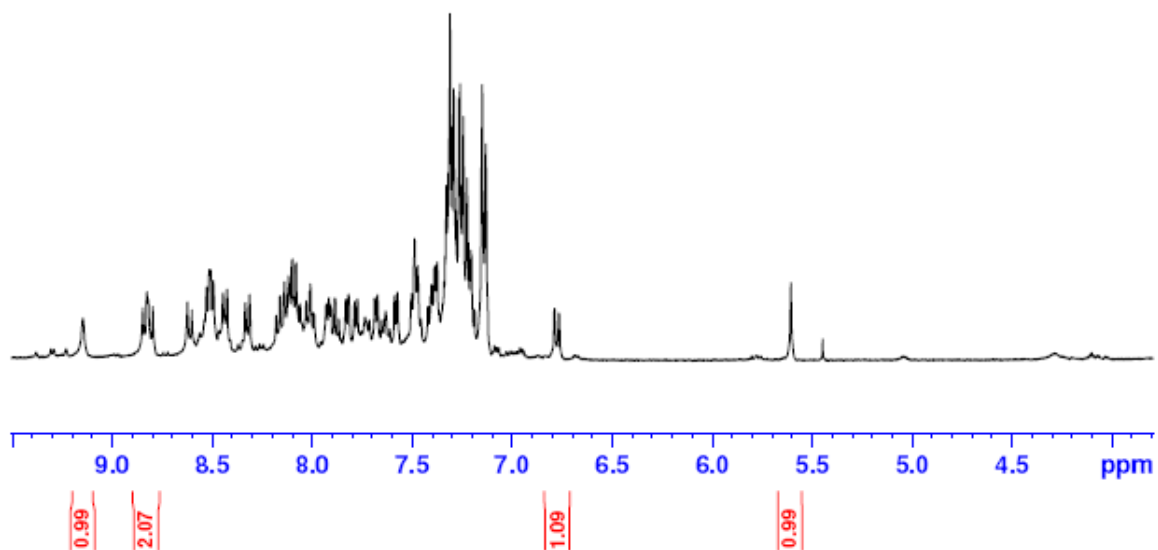

Figure S16.  $^1\text{H}$  NMR of reaction mixture of  $[\text{Ru}(\mathbf{2HH})]^{2+}$  and  $[\text{Ph}_3\text{C}]^+$  in  $\text{CD}_3\text{CN}$ , showing the formation of  $\text{Ph}_3\text{CH}$  (5.6 ppm) in a 1:1 ratio with  $[\text{Ru}(\mathbf{2})]^{2+}$ . Characteristic peaks are integrated at 5.6 for  $\text{Ph}_3\text{CH}$  and 9.07, 8.84-8.80, and 6.78 ppm for  $[\text{Ru}(\mathbf{2})]^{2+}$ .

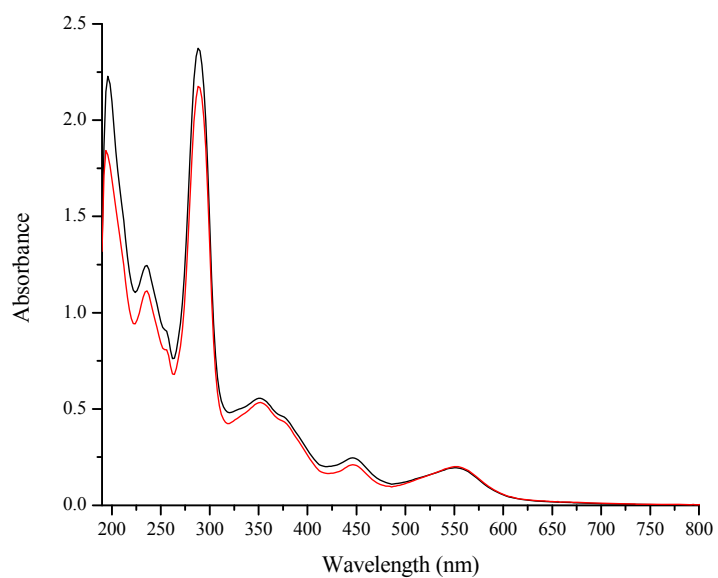

Figure S17. UV-vis spectra of  $[\text{Ru}(\mathbf{2})]^{2+}$  before (red) and after (black) photochemical reduction, hydride donation, and purification in  $\text{CH}_3\text{CN}$ .

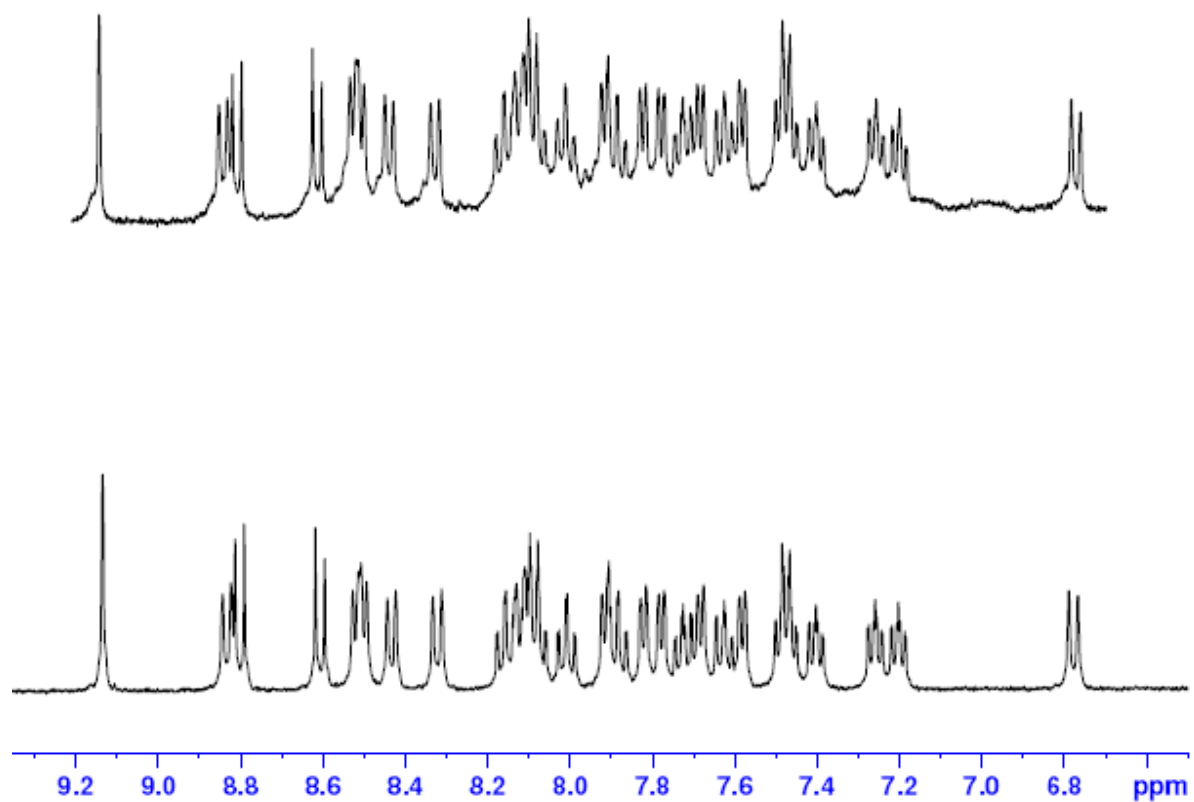

Figure S18.  $^1\text{H}$  NMR of  $[\text{Ru}(\mathbf{2})]^{2+}$  starting material (bottom) and after photochemical reduction, hydride donation, and purification (top) in  $\text{CD}_3\text{CN}$ .

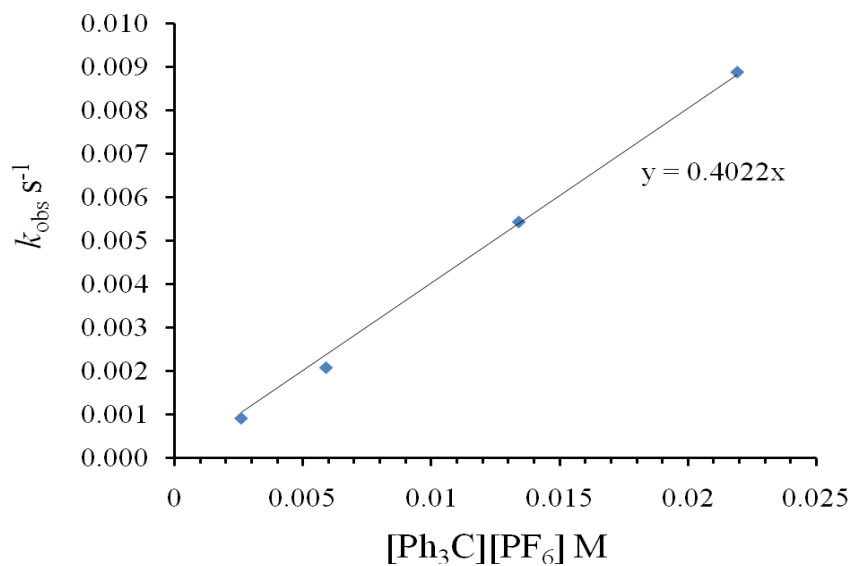

Figure S19. The bimolecular rate constant of hydride donation from  $[\text{Ru}(\mathbf{2HH})]^{2+}$  to  $[\text{Ph}_3\text{C}]^+$  in  $\text{CH}_3\text{CN}$ .

**Table S1.** Computed Geometrical Parameters of **Ru(2)** Species.

|                           | [Ru(2)] <sup>2+</sup> | [Ru(2 <sup>+</sup> )] <sup>+</sup> | [Ru(2H <sup>+</sup> )] <sup>2+</sup> | [Ru(2H)] <sup>3+</sup> | [Ru(2HH)] <sup>2+</sup> |
|---------------------------|-----------------------|------------------------------------|--------------------------------------|------------------------|-------------------------|
| Ru–N pyridyl              | 2.085                 | 2.094                              | 2.091                                | 2.081                  | 2.088                   |
| Ru–N pbn                  | 2.157                 | 2.141                              | 2.166                                | 2.159                  | 2.171                   |
| Ru–N <sub>bpy1</sub> (tr) | 2.101                 | 2.091                              | 2.122                                | 2.126                  | 2.118                   |
| Ru–N <sub>bpy1</sub>      | 2.095                 | 2.083                              | 2.096                                | 2.101                  | 2.095                   |
| Ru–N <sub>bpy2</sub> (tr) | 2.089                 | 2.092                              | 2.090                                | 2.085                  | 2.088                   |
| Ru–N <sub>bpy2</sub>      | 2.092                 | 2.081                              | 2.091                                | 2.096                  | 2.090                   |
| C9–H                      | 1.092                 | 1.089                              | 1.087                                | 1.088                  | 1.097, 1.102            |
| N10–H                     | n/a                   | n/a                                | 1.016                                | 1.021                  | 1.009                   |
| C5–C12                    | 1.407                 | 1.424                              | 1.430                                | 1.398                  | 1.513                   |
| C12–C13                   | 1.453                 | 1.445                              | 1.431                                | 1.436                  | 1.402                   |
| C13–N10                   | 1.369                 | 1.382                              | 1.404                                | 1.370                  | 1.409                   |
| C9–C12                    | 1.407                 | 1.398                              | 1.409                                | 1.405                  | 1.514                   |
| C11–C12                   | 1.453                 | 1.467                              | 1.449                                | 1.427                  | 1.420                   |
| C11–N10                   | 1.347                 | 1.350                              | 1.375                                | 1.354                  | 1.366                   |
| N1–C11–C12–C9             | 179.97                | 179.99                             | 179.44                               | 179.69                 | 176.82                  |
| N <sub>bpy</sub> ⋯H       | n/a                   | n/a                                | 2.069                                | 2.036                  | 2.083                   |
| N10–N <sub>bpy</sub>      | n/a                   | n/a                                | 3.047                                | 3.035                  | 3.066                   |
| N10–H⋯N <sub>bpy</sub>    | n/a                   | n/a                                | 163.9                                | 165.5                  | 163.9                   |

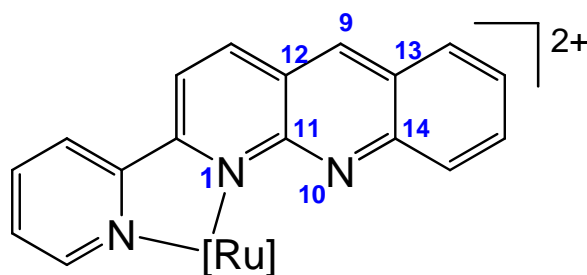

Supplement: c1fd00094b.pdf [file c1fd00094b.pdf]
